# Supplementary material for: Collective hydration dynamics of guanidinium chloride solutions and its possible role in protein denaturation: a terahertz spectroscopic study
Source: Royal Society of Chemistry journal article supplement (doi:10.1039/c4cp03273j), 2014-09-09
Supplement: c4cp03273j1.pdf [file c4cp03273j1.pdf]

*Supporting Information for,*

# Collective Hydration Dynamics of Guanidinium Chloride Solutions and its Possible Role in Protein Denaturation: A Terahertz Spectroscopic Study

Nirnay Samanta, Debasish Das Mahanta and Rajib Kumar Mitra\*

Department of Chemical, Biological and Macromolecular Sciences

S.N. Bose National Centre for Basic Sciences

Block JD, Sector III, Salt Lake, Kolkata 700098, INDIA

**Table S1.** Debye relaxation fitting parameters of aqueous solutions of GdmCl at different concentrations.

| [GdmCl]<br>(M) | $\epsilon_{\infty}$ | <sup>(a)</sup> S <sub>1</sub> | S <sub>2</sub> | S <sub>3</sub> | $\tau_1$<br>(ps) | $\tau_2$<br>(fs) | $\tau_3$<br>(fs) | $\sigma$<br>(S m <sup>-1</sup> ) |
|----------------|---------------------|-------------------------------|----------------|----------------|------------------|------------------|------------------|----------------------------------|
| 0              | 1.76±0.03           | 71.16                         | 0.34±0.04      | 1.54±0.10      | 8.94±0.1         | 227±70           | 74               | 0.20                             |
| 1              | 1.91±0.03           | 62.70                         | 0.46±0.07      | 1.47±0.06      | 9.02±0.1         | 233±63           | 86               | 8.02                             |
| 2              | 1.93±0.03           | 54.29                         | 0.69±0.07      | 1.45±0.06      | 8.91±0.1         | 222±39           | 86               | 14.63                            |
| 3              | 1.94±0.03           | 46.38                         | 0.92±0.08      | 1.39±0.06      | 8.72±0.2         | 218±29           | 84               | 19.20                            |
| 4              | 2.07±0.03           | 38.59                         | 1.17±0.07      | 1.17±0.06      | 8.33±0.1         | 204±19           | 86               | 22.82                            |
| 5              | 2.05±0.03           | 33.06                         | 1.29±0.07      | 1.27±0.06      | 8.20±0.16        | 207±19           | 86               | 25.22                            |
| 6              | 2.09±0.03           | 27.75                         | 1.46±0.07      | 1.26±0.06      | 7.77±0.2         | 200±15           | 86               | 26.01                            |

<sup>(a)</sup> Values are taken from, *J Phys. Chem. B*, 2010, **114**, 13617-13627.

**Table S2.** Debye relaxation fitting parameters of aqueous solutions of TMGdmCl at different concentrations.

| [TMGdmCl] (M) | $\epsilon_{\infty}$ | <sup>(b)</sup> S <sub>slow</sub> | <sup>(c)</sup> S <sub>1</sub> | S <sub>2</sub> | S <sub>3</sub> | <sup>(b)</sup> $\tau_{\text{slow}}$ (ps) | $\tau_1$ (ps) | $\tau_2$ (fs) | $\tau_3$ (fs) | $\sigma$ (S m <sup>-1</sup> ) |
|---------------|---------------------|----------------------------------|-------------------------------|----------------|----------------|------------------------------------------|---------------|---------------|---------------|-------------------------------|
| 0.5           | 2.07±0.03           | 10.52                            | 65.92                         | 0.56±0.06      | 1.3±0.1        | 21.85                                    | 11.05±0.2     | 213±44        | 80            | 5.0                           |
| 1             | 2.06±0.03           | 12.32                            | 58.98                         | 0.75±0.06      | 1.3±0.1        | 31.87                                    | 12.48±0.3     | 218±35        | 80            | 7.0                           |
| 1.5           | 2.03±0.04           | 14.56                            | 55.35                         | 0.90±0.07      | 1.0±0.1        | 33.21                                    | 16.92±0.4     | 192±24        | 79            | 9.0                           |

<sup>(b)</sup> Values taken from: *J. Am. Chem. Soc.* 2010, **132**, 15671-15678

**Table S3.** Debye relaxation fitting parameters of aqueous solutions of NaCl at different concentrations.

| [NaCl] (M) | $\epsilon_{\infty}$ | <sup>(c)</sup> S <sub>1</sub> | S <sub>2</sub> | S <sub>3</sub> | $\tau_1$ (ps) | $\tau_2$ (fs) | $\tau_3$ (fs) | $\sigma$ (S m <sup>-1</sup> ) |
|------------|---------------------|-------------------------------|----------------|----------------|---------------|---------------|---------------|-------------------------------|
| 1          | 1.99                | 58.20                         | 0.39±0.06      | 1.74±0.07      | 7.62±0.14     | 281±90        | 79            | 8.26                          |
| 2          | 2.07                | 51.66                         | 0.56±0.03      | 1.74± 0.08     | 7.04±0.11     | 256±55        | 79            | 11.96                         |
| 3          | 2.05                | 44.97                         | 0.67±0.03      | 1.86±0.08      | 6.63±0.10     | 249±43        | 80            | 16.02                         |
| 4          | 2.07                | 36.58                         | 0.86±0.03      | 2.05±0.06      | 6.46±0.12     | 261±33        | 81            | 21.60                         |
| 5          | 2.05                | 32.83                         | 0.89±0.03      | 2.30±0.06      | 6.01±0.04     | 274±35        | 79            | 22.29                         |

<sup>(c)</sup> Values are taken from, *J. Chem. Phys.* 1948, **16**, 1-20.
